# Supplementary material for: Highly Porous Cyanometallic Spin-Crossover Frameworks Employing Pyridazino[4,5-d]pyridazine Bridge
Source: MDPI journal article supplement (doi:10.3390/inorganics10110195), 2022-11-02
Supplement: s1 [file s1]

# Supplementary Materials:

## Highly Porous Cyanometallic Spin-Crossover Frameworks Employing Pyridazino[4,5-d]pyridazine Bridge

Volodymyr M. Hiiuk <sup>1</sup>, Sergiu Shova <sup>1,2</sup>, Konstantin V. Domasevitch <sup>1</sup>  
and Il'ya A. Gural'skiy <sup>1,\*</sup>

<sup>1</sup> Department of Chemistry, Taras Shevchenko National University of Kyiv, 64 Volodymyrska St., 01601 Kyiv, Ukraine

<sup>2</sup> Ningbo University of Technology, No. 201, Fenghua Road, Ningbo City, Zhejiang, 315211, China

<sup>3</sup> "Petru Poni" Institute of Macromolecular Chemistry, 41A Aleea Gr. Ghica Voda, 700487 Iasi, Romania

\* Correspondence: illia.guralskiy@univ.kiev.ua; Tel.: (+38) 044 239 33 71

### Contents of the Supplementary Materials:

|                                                                                                                                                                                                          |        |
|----------------------------------------------------------------------------------------------------------------------------------------------------------------------------------------------------------|--------|
| <b>Figure S1.</b> View of the 1D channel of <b>1</b> (a) and <b>2</b> (b) along the <i>a</i> -axis direction. The gate sizes of the pores of <b>1</b> and <b>2</b> in the LS (blue) and HS (red) states. | p. S-2 |
| <b>Figure S2.</b> Temperature dependences of $\beta$ angles of <b>1</b> (a) and <b>2</b> (b).                                                                                                            | p. S-2 |
| <b>Table S1.</b> Selected crystallographic data for <b>1</b> extracted from SCXRD pre-experiments at various temperatures.                                                                               | p. S-3 |
| <b>Table S2.</b> Selected crystallographic data for <b>2</b> extracted from SCXRD pre-experiments at various temperatures.                                                                               | p. S-3 |
| <b>Tables S3-S32:</b> Crystallographic Tables for <b>1</b> (Tables S3-S17) and <b>2</b> (Tables S18-S32).                                                                                                | p. S-4 |

**1:** [Fe(*pp*)Pd(CN)<sub>4</sub>] $\cdot$ G

**2:** [Fe(*pp*)Pt(CN)<sub>4</sub>] $\cdot$ G

where:

*pp* = pyridazino[4,5-d]pyridazine

G = guest solvent molecules (MeOH and H<sub>2</sub>O)

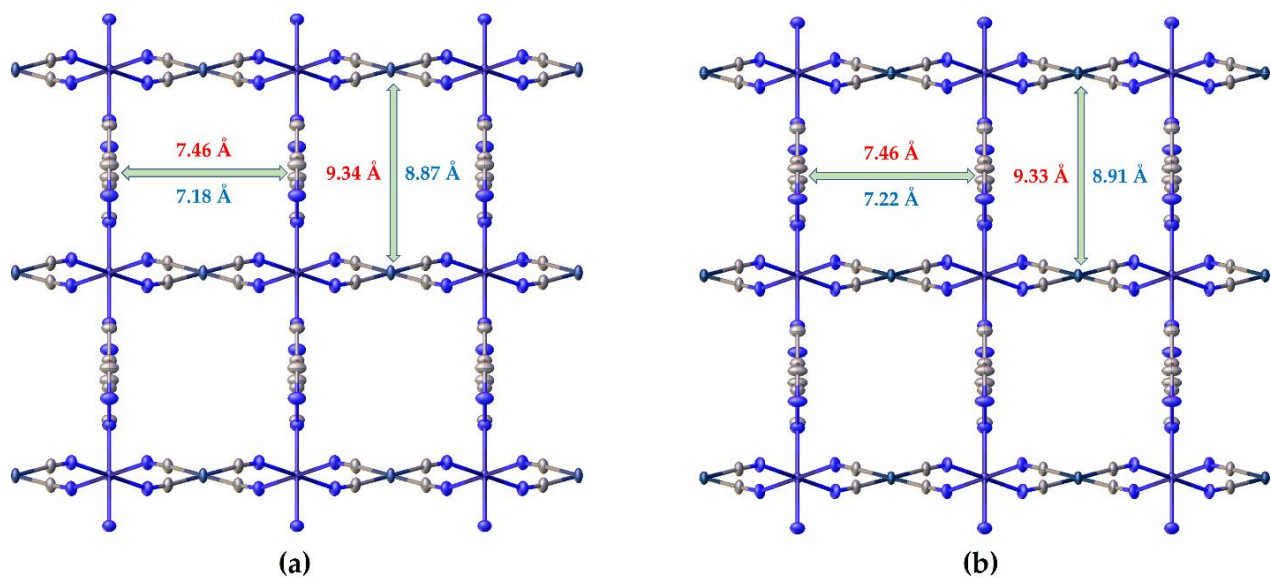

**Figure S1.** View of the 1D channel of **1** (a) and **2** (b) along the *a*-axis direction. The gate sizes of the pores of **1** and **2** in the LS (blue) and HS (red) states.

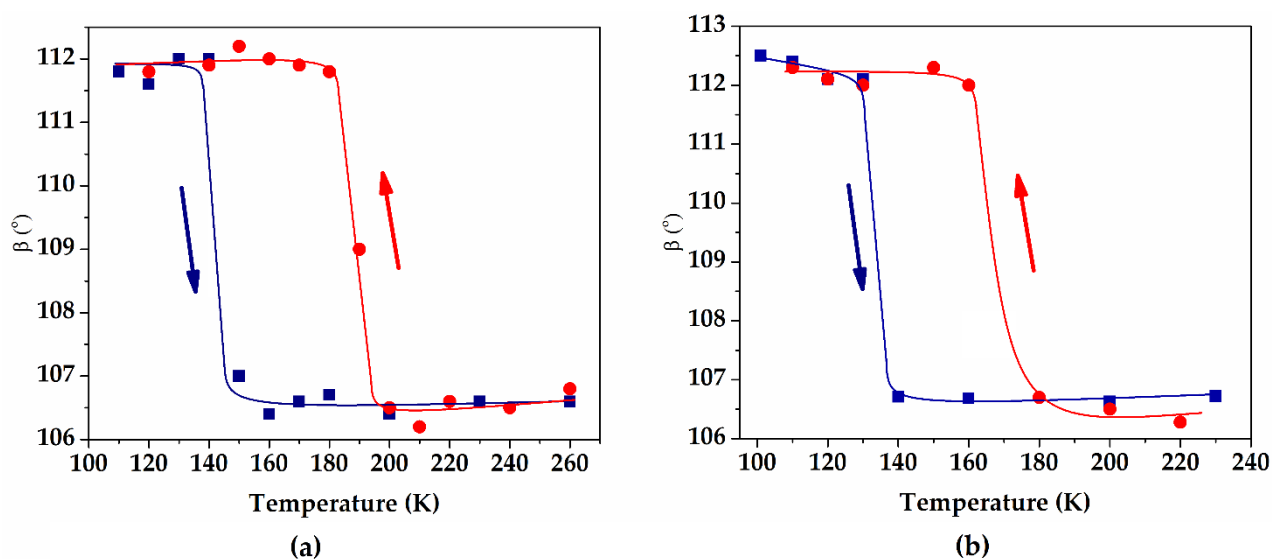

**Figure S2.** Temperature dependences of  $\beta$  angles of **1** (a) and **2** (b).

**Table S1.** Selected crystallographic data for **1** extracted from SCXRD pre-experiments at various temperatures.

| Temperature (K)       | <i>a</i> (Å) | <i>b</i> (Å) | <i>c</i> (Å) | $\beta$ (°) | <i>V</i> (Å <sup>3</sup> ) |
|-----------------------|--------------|--------------|--------------|-------------|----------------------------|
| <b>Cooling regime</b> |              |              |              |             |                            |
| 260                   | 7.22(3)      | 7.398(18)    | 8.42(5)      | 106.6(5)    | 431(3)                     |
| 230                   | 7.20(2)      | 7.423(12)    | 8.39(2)      | 106.6(3)    | 430(2)                     |
| 200                   | 7.22(3)      | 7.400(17)    | 8.37(5)      | 106.4(5)    | 429(3)                     |
| 180                   | 7.20(3)      | 7.407(15)    | 8.40(4)      | 106.7(4)    | 429(3)                     |
| 170                   | 7.20(5)      | 7.375(15)    | 8.40(8)      | 106.6(9)    | 428(5)                     |
| 160                   | 7.18(3)      | 7.42(2)      | 8.40(6)      | 106.4(3)    | 429(7)                     |
| 150                   | 7.08(2)      | 7.40(2)      | 8.48(14)     | 107.0(9)    | 408(1)                     |
| 140                   | 7.08(2)      | 7.19(3)      | 8.72(4)      | 112.0(2)    | 409(2)                     |
| 130                   | 7.07(3)      | 7.125(14)    | 8.72(3)      | 112.0(4)    | 408(2)                     |
| 120                   | 7.05(4)      | 7.14(5)      | 8.73(2)      | 111.6(7)    | 406(5)                     |
| <b>Heating regime</b> |              |              |              |             |                            |
| 120                   | 7.12(4)      | 7.15(4)      | 8.61(5)      | 111.8(5)    | 407(4)                     |
| 130                   | 7.04(2)      | 7.138(8)     | 8.747(16)    | 111.4(5)    | 408(2)                     |
| 140                   | 7.08(5)      | 7.151(19)    | 8.68(4)      | 111.9(5)    | 408(4)                     |
| 150                   | 7.06(2)      | 7.14(2)      | 8.73(3)      | 112.2(3)    | 407(2)                     |
| 160                   | 7.08(5)      | 7.15(3)      | 8.72(4)      | 112.0(5)    | 409(4)                     |
| 170                   | 7.05(8)      | 7.129(18)    | 8.70(2)      | 111.9(2)    | 409(4)                     |
| 180                   | 7.08(5)      | 7.16(4)      | 8.65(5)      | 111.8(6)    | 408(5)                     |
| 190                   | 7.02(4)      | 7.33(11)     | 8.62(5)      | 109.0(4)    | 420(5)                     |
| 200                   | 7.20(9)      | 7.41(4)      | 8.40(6)      | 106.5(4)    | 429(6)                     |
| 210                   | 7.19(10)     | 7.47(8)      | 8.38(5)      | 106.2(5)    | 433(8)                     |
| 220                   | 7.18(3)      | 7.44(4)      | 8.39(4)      | 106.6(7)    | 430(4)                     |
| 240                   | 7.216(12)    | 7.47(3)      | 8.37(4)      | 106.5(1)    | 433(4)                     |
| 260                   | 7.19(6)      | 7.45(3)      | 8.39(2)      | 106.8(6)    | 430(3)                     |

**Table S2.** Selected crystallographic data for **2** extracted from SCXRD pre-experiments at various temperatures.

| Temperature (K)       | <i>a</i> (Å) | <i>b</i> (Å) | <i>c</i> (Å) | $\beta$ (°) | <i>V</i> (Å <sup>3</sup> ) |
|-----------------------|--------------|--------------|--------------|-------------|----------------------------|
| <b>Cooling regime</b> |              |              |              |             |                            |
| 230                   | 7.181(4)     | 7.456(3)     | 8.386(7)     | 106.72(8)   | 430(1)                     |
| 200                   | 7.183(5)     | 7.447(3)     | 8.382(9)     | 106.63(9)   | 429.7(6)                   |
| 160                   | 7.187(6)     | 7.433(3)     | 8.372(9)     | 106.68(10)  | 428.5(6)                   |
| 140                   | 7.194(3)     | 7.433(2)     | 8.366(4)     | 106.71(5)   | 428.5(3)                   |
| 130                   | 7.01(4)      | 7.206(7)     | 8.760(4)     | 112.1(7)    | 410(3)                     |
| 120                   | 7.040(18)    | 7.186(6)     | 8.740(2)     | 112.1(4)    | 410(2)                     |
| 110                   | 7.06(3)      | 7.199(12)    | 8.750(3)     | 112.4(5)    | 411(3)                     |
| 101                   | 7.056(15)    | 7.179(6)     | 8.739(16)    | 112.5(3)    | 409(1)                     |
| <b>Heating regime</b> |              |              |              |             |                            |
| 110                   | 7.034(16)    | 7.184(14)    | 8.742(14)    | 112.3(2)    | 409(1)                     |
| 120                   | 7.038(9)     | 7.181(3)     | 8.721(17)    | 112.1(2)    | 408.4(1)                   |
| 130                   | 7.03(4)      | 7.214(11)    | 8.730(4)     | 112.0(7)    | 411(3)                     |
| 140                   | 7.04(3)      | 7.186(9)     | 8.720(2)     | 112.8(5)    | 407(2)                     |
| 150                   | 7.03(2)      | 7.188(14)    | 8.720(5)     | 112.3(6)    | 408(3)                     |
| 160                   | 7.03(6)      | 7.198(5)     | 8.73(14)     | 112(2)      | 409(7)                     |
| 180                   | 7.19(4)      | 7.411(15)    | 8.370(3)     | 106.7(8)    | 427(3)                     |
| 200                   | 7.189(12)    | 7.442(11)    | 8.34(3)      | 106.5(3)    | 428(2)                     |
| 220                   | 7.175(13)    | 7.451(7)     | 8.376(8)     | 106.28(14)  | 429.8(1)                   |

**Table S3.** Crystal data and structure refinement for **1** at 293 K and 125 K.

|                                                                         |                                                                              |                                                                              |
|-------------------------------------------------------------------------|------------------------------------------------------------------------------|------------------------------------------------------------------------------|
| <b>Empirical formula</b>                                                | C <sub>10</sub> H <sub>4</sub> FeN <sub>8</sub> Pd                           | C <sub>10</sub> H <sub>4</sub> FeN <sub>8</sub> Pd                           |
| <b>Formula weight</b>                                                   | 398.46                                                                       | 398.46                                                                       |
| <b>Temperature (K)</b>                                                  | 293                                                                          | 125                                                                          |
| <b>Crystal system</b>                                                   | monoclinic                                                                   | monoclinic                                                                   |
| <b>Space group</b>                                                      | <i>P2/m</i>                                                                  | <i>P2/m</i>                                                                  |
| <b><i>a</i> (Å)</b>                                                     | 7.1903(3)                                                                    | 7.0619(6)                                                                    |
| <b><i>b</i> (Å)</b>                                                     | 7.4599(2)                                                                    | 7.1811(5)                                                                    |
| <b><i>c</i> (Å)</b>                                                     | 8.4271(4)                                                                    | 8.6859(7)                                                                    |
| <b><math>\alpha</math> (°)</b>                                          | 90                                                                           | 90                                                                           |
| <b><math>\beta</math> (°)</b>                                           | 107.071(5)                                                                   | 112.392(10)                                                                  |
| <b><math>\gamma</math> (°)</b>                                          | 90                                                                           | 90                                                                           |
| <b>Volume (Å<sup>3</sup>)</b>                                           | 432.11(3)                                                                    | 407.27(6)                                                                    |
| <b>Z</b>                                                                | 1                                                                            | 1                                                                            |
| <b><math>\rho_{\text{calc}}</math> (g cm<sup>-3</sup>)</b>              | 1.531                                                                        | 1.625                                                                        |
| <b><math>\mu</math> (mm<sup>-1</sup>)</b>                               | 1.880                                                                        | 1.995                                                                        |
| <b>F(000)</b>                                                           | 192.0                                                                        | 192.0                                                                        |
| <b>Crystal size (mm<sup>3</sup>)</b>                                    | 0.25 × 0.25 × 0.05                                                           | 0.25 × 0.15 × 0.04                                                           |
| <b>Radiation</b>                                                        | MoK $\alpha$ ( $\lambda$ = 0.71073)                                          | MoK $\alpha$ ( $\lambda$ = 0.71073)                                          |
| <b>2<math>\Theta</math> range for data collection (°)</b>               | 5.056 to 65.124                                                              | 5.072 to 64.724                                                              |
| <b>Reflections collected</b>                                            | 5312                                                                         | 2697                                                                         |
| <b>Independent reflections</b>                                          | 1562 [ <i>R</i> <sub>int</sub> = 0.0398, <i>R</i> <sub>sigma</sub> = 0.0393] | 1438 [ <i>R</i> <sub>int</sub> = 0.0382, <i>R</i> <sub>sigma</sub> = 0.0639] |
| <b>Data/restraints/parameters</b>                                       | 1562 / 0 / 57                                                                | 1438 / 0 / 57                                                                |
| <b>Goodness-of-fit on F<sup>2</sup></b>                                 | 1.065                                                                        | 1.059                                                                        |
| <b>Final R indexes [<i>I</i> &gt;= 2<math>\sigma</math> (<i>I</i>)]</b> | <i>R</i> <sub>1</sub> = 0.0251, <i>wR</i> <sub>2</sub> = 0.0588              | <i>R</i> <sub>1</sub> = 0.0425, <i>wR</i> <sub>2</sub> = 0.0886              |
| <b>Final R indexes [all data]</b>                                       | <i>R</i> <sub>1</sub> = 0.0309, <i>wR</i> <sub>2</sub> = 0.0606              | <i>R</i> <sub>1</sub> = 0.0469, <i>wR</i> <sub>2</sub> = 0.0905              |
| <b>Largest diff. peak/hole (e Å<sup>-3</sup>)</b>                       | 0.63 / -0.39                                                                 | 1.47 / -1.41                                                                 |

**Table S4.** Fractional Atomic Coordinates (×10<sup>4</sup>) and Equivalent Isotropic Displacement Parameters (Å<sup>2</sup>×10<sup>3</sup>) for **1** at 293 K (HS). *U*<sub>eq</sub> is defined as 1/3 of the trace of the orthogonalised *U*<sub>ij</sub> tensor.

| <b>Atom</b> | <b><i>x</i></b> | <b><i>y</i></b> | <b><i>z</i></b> | <b><i>U</i>(eq)</b> |
|-------------|-----------------|-----------------|-----------------|---------------------|
| Pd1         | 5000            | 5000            | 5000            | 21.29(9)            |
| Fe1         | 0               | 0               | 5000            | 16.19(11)           |
| N2          | 2140(3)         | 0               | 7484(3)         | 24.3(4)             |
| N1          | 1784(2)         | 2025(2)         | 4360(2)         | 28.9(4)             |
| N3          | 1397(3)         | 0               | 8801(3)         | 32.6(5)             |
| C3          | 5367(3)         | 0               | 9324(3)         | 24.3(5)             |
| C1          | 2946(2)         | 3120(2)         | 4530(3)         | 25.6(4)             |
| C2          | 4030(3)         | 0               | 7737(3)         | 26.1(5)             |
| C4          | 2575(4)         | 0               | 10307(4)        | 33.4(6)             |

**Table S5.** Anisotropic Displacement Parameters ( $\text{\AA}^2 \times 10^3$ ) for **1** at 293 K (HS). The Anisotropic displacement factor exponent takes the form:  $-2\pi^2[h^2a^{*2}U_{11}+2hka^*b^*U_{12}+\dots]$ .

| Atom | U <sub>11</sub> | U <sub>22</sub> | U <sub>33</sub> | U <sub>23</sub> | U <sub>13</sub> | U <sub>12</sub> |
|------|-----------------|-----------------|-----------------|-----------------|-----------------|-----------------|
| Pd1  | 12.38(12)       | 12.93(12)       | 38.96(18)       | 0               | 8.17(11)        | 0               |
| Fe1  | 9.00(19)        | 14.6(2)         | 23.0(3)         | 0               | 1.64(18)        | 0               |
| N2   | 14.5(9)         | 33.2(11)        | 23.7(11)        | 0               | 3.2(8)          | 0               |
| N1   | 23.1(7)         | 24.0(7)         | 38.2(10)        | 1.8(7)          | 6.9(7)          | -4.9(6)         |
| N3   | 13.2(9)         | 56.2(15)        | 27.7(12)        | 0               | 4.7(9)          | 0               |
| C3   | 10.6(10)        | 37.9(13)        | 23.5(13)        | 0               | 3.6(10)         | 0               |
| C1   | 17.9(8)         | 18.8(8)         | 39.5(11)        | 2.6(8)          | 7.5(8)          | 1.0(6)          |
| C2   | 15.1(10)        | 41.2(14)        | 21.9(12)        | 0               | 5.2(10)         | 0               |
| C4   | 13.1(11)        | 61.7(19)        | 25.6(14)        | 0               | 5.8(10)         | 0               |

**Table S6.** Bond Lengths for **1** at 293 K (HS).

| Atom | Atom            | Length ( $\text{\AA}$ ) |  | Atom | Atom            | Length ( $\text{\AA}$ ) |
|------|-----------------|-------------------------|--|------|-----------------|-------------------------|
| Pd1  | C1              | 1.9907(17)              |  | Fe1  | N1 <sup>6</sup> | 2.1503(15)              |
| Pd1  | C1 <sup>1</sup> | 1.9907(17)              |  | N2   | N3              | 1.365(3)                |
| Pd1  | C1 <sup>2</sup> | 1.9907(17)              |  | N2   | C2              | 1.313(3)                |
| Pd1  | C1 <sup>3</sup> | 1.9907(17)              |  | N1   | C1              | 1.147(2)                |
| Fe1  | N2              | 2.204(2)                |  | N3   | C4              | 1.303(4)                |
| Fe1  | N2 <sup>4</sup> | 2.204(2)                |  | C3   | C3 <sup>7</sup> | 1.390(5)                |
| Fe1  | N1 <sup>5</sup> | 2.1503(15)              |  | C3   | C2              | 1.400(4)                |
| Fe1  | N1              | 2.1503(15)              |  | C3   | C4 <sup>7</sup> | 1.419(3)                |
| Fe1  | N1 <sup>4</sup> | 2.1503(15)              |  |      |                 |                         |

<sup>1</sup>1-X,+Y,1-Z; <sup>2</sup>4-X,1-Y,+Z; <sup>3</sup>1-X,1-Y,1-Z; <sup>4</sup>4-X,-Y,1-Z; <sup>5</sup>4-X,+Y,1-Z; <sup>6</sup>4-X,-Y,+Z; <sup>7</sup>1-X,-Y,2-Z

**Table S7.** Bond Angles for **1** at 293 K (HS).

| Atom            | Atom | Atom            | Angle (°) |  | Atom            | Atom | Atom            | Angle (°)  |
|-----------------|------|-----------------|-----------|--|-----------------|------|-----------------|------------|
| C1              | Pd1  | C1 <sup>1</sup> | 180.0     |  | N1              | Fe1  | N1 <sup>5</sup> | 89.24(8)   |
| C1 <sup>2</sup> | Pd1  | C1 <sup>3</sup> | 180.0     |  | N1 <sup>4</sup> | Fe1  | N1 <sup>6</sup> | 89.24(8)   |
| C1              | Pd1  | C1 <sup>2</sup> | 89.61(10) |  | N1              | Fe1  | N1 <sup>4</sup> | 180.0      |
| C1 <sup>1</sup> | Pd1  | C1 <sup>3</sup> | 89.61(10) |  | N1              | Fe1  | N1 <sup>6</sup> | 90.76(8)   |
| C1 <sup>1</sup> | Pd1  | C1 <sup>2</sup> | 90.39(10) |  | N1 <sup>5</sup> | Fe1  | N1 <sup>6</sup> | 180.00(9)  |
| C1              | Pd1  | C1 <sup>3</sup> | 90.39(10) |  | N3              | N2   | Fe1             | 116.19(14) |
| N2              | Fe1  | N2 <sup>4</sup> | 180.0     |  | C2              | N2   | Fe1             | 123.68(18) |
| N1 <sup>5</sup> | Fe1  | N2              | 86.38(6)  |  | C2              | N2   | N3              | 120.1(2)   |
| N1              | Fe1  | N2 <sup>4</sup> | 93.62(6)  |  | C1              | N1   | Fe1             | 159.26(16) |
| N1              | Fe1  | N2              | 86.38(6)  |  | C4              | N3   | N2              | 119.6(2)   |
| N1 <sup>5</sup> | Fe1  | N2 <sup>4</sup> | 93.61(6)  |  | C3 <sup>7</sup> | C3   | C2              | 117.6(3)   |
| N1 <sup>4</sup> | Fe1  | N2              | 93.62(6)  |  | C3 <sup>7</sup> | C3   | C4 <sup>7</sup> | 116.3(3)   |
| N1 <sup>6</sup> | Fe1  | N2              | 93.62(6)  |  | C2              | C3   | C4 <sup>7</sup> | 126.1(2)   |
| N1 <sup>6</sup> | Fe1  | N2 <sup>4</sup> | 86.39(6)  |  | N1              | C1   | Pd1             | 175.88(17) |
| N1 <sup>4</sup> | Fe1  | N2 <sup>4</sup> | 86.39(6)  |  | N2              | C2   | C3              | 122.9(2)   |
| N1 <sup>4</sup> | Fe1  | N1 <sup>5</sup> | 90.76(8)  |  | N3              | C4   | C3 <sup>7</sup> | 123.5(2)   |

<sup>1</sup>1-X,1-Y,1-Z; <sup>2</sup>4-X,1-Y,+Z; <sup>3</sup>1-X,+Y,1-Z; <sup>4</sup>4-X,-Y,1-Z; <sup>5</sup>4-X,-Y,+Z; <sup>6</sup>4-X,+Y,1-Z; <sup>7</sup>1-X,-Y,2-Z

**Table S8.** Torsion Angles for **1** at 293 K (HS).

| A   | B  | C  | D               | Angle (°)  |  | A               | B  | C  | D  | Angle (°)  |
|-----|----|----|-----------------|------------|--|-----------------|----|----|----|------------|
| Fe1 | N2 | N3 | C4              | 180.000(1) |  | C3 <sup>1</sup> | C3 | C2 | N2 | 0.000(1)   |
| Fe1 | N2 | C2 | C3              | 180.000(1) |  | C2              | N2 | N3 | C4 | 0.000(1)   |
| N2  | N3 | C4 | C3 <sup>1</sup> | 0.000(2)   |  | C4 <sup>1</sup> | C3 | C2 | N2 | 180.000(1) |
| N3  | N2 | C2 | C3              | 0.000(1)   |  |                 |    |    |    |            |

<sup>1</sup>1-X,-Y,2-Z**Table S9.** Hydrogen Atom Coordinates (Å×10<sup>4</sup>) and Isotropic Displacement Parameters (Å<sup>2</sup>×10<sup>3</sup>) for **1** at 293 K (HS).

| Atom | <i>x</i> | <i>y</i> | <i>z</i> | U(eq) |
|------|----------|----------|----------|-------|
| H2   | 4501.41  | 0        | 6820.17  | 31    |
| H4   | 2040.42  | 0        | 11186.33 | 40    |

**Table S10.** Solvent masks information for **1** at 293 K (HS).

| X      | Y     | Z     | Volume | Electron count Content |
|--------|-------|-------|--------|------------------------|
| -0.619 | 0.500 | 0.000 | 159.1  | 35.0                   |

**Table S11.** Fractional Atomic Coordinates (×10<sup>4</sup>) and Equivalent Isotropic Displacement Parameters (Å<sup>2</sup>×10<sup>3</sup>) for **1** at 125 K (LS). U<sub>eq</sub> is defined as 1/3 of the trace of the orthogonalised U<sub>ij</sub> tensor.

| Atom | <i>x</i> | <i>y</i> | <i>z</i> | U(eq)    |
|------|----------|----------|----------|----------|
| Pd1  | 5000     | 0        | 10000    | 8.02(12) |
| Fe1  | 10000    | 5000     | 10000    | 8.47(17) |
| N2   | 8026(5)  | 5000     | 7665(4)  | 10.6(7)  |
| N3   | 8801(5)  | 5000     | 6438(4)  | 13.8(7)  |
| N1   | 8330(4)  | 3082(4)  | 10436(3) | 11.3(5)  |
| C1   | 7147(4)  | 1952(4)  | 10379(3) | 11.3(5)  |
| C3   | 5386(6)  | 5000     | 4368(5)  | 10.9(8)  |
| C4   | 6023(6)  | 5000     | 7278(5)  | 13.5(8)  |
| C2   | 7547(6)  | 5000     | 4889(5)  | 15.0(8)  |

**Table S12.** Anisotropic Displacement Parameters (Å<sup>2</sup>×10<sup>3</sup>) for **1** at 125 K (LS). The Anisotropic displacement factor exponent takes the form: -2π<sup>2</sup>[h<sup>2</sup>a<sup>2</sup>U<sub>11</sub>+2hka\*b\*U<sub>12</sub>+...].

| Atom | U <sub>11</sub> | U <sub>22</sub> | U <sub>33</sub> | U <sub>23</sub> | U <sub>13</sub> | U <sub>12</sub> |
|------|-----------------|-----------------|-----------------|-----------------|-----------------|-----------------|
| Pd1  | 6.1(2)          | 4.00(19)        | 15.0(2)         | 0               | 5.15(16)        | 0               |
| Fe1  | 7.0(4)          | 6.6(4)          | 11.9(4)         | 0               | 3.8(3)          | 0               |
| N2   | 9.1(15)         | 11.7(16)        | 13.2(15)        | 0               | 6.6(13)         | 0               |
| N3   | 11.7(16)        | 18.7(18)        | 13.5(16)        | 0               | 7.5(14)         | 0               |
| N1   | 10.1(11)        | 10.5(11)        | 12.2(11)        | -0.2(9)         | 3.0(9)          | 2.9(10)         |
| C1   | 10.1(12)        | 9.9(12)         | 14.1(13)        | -0.6(11)        | 4.8(11)         | 1.0(11)         |
| C3   | 7.2(16)         | 13.6(19)        | 12.1(17)        | 0               | 3.9(15)         | 0               |
| C4   | 11.9(18)        | 14.5(19)        | 15.5(18)        | 0               | 7.0(16)         | 0               |
| C2   | 10.0(18)        | 22(2)           | 15.0(19)        | 0               | 6.4(16)         | 0               |

**Table S13.** Bond Lengths for **1** at 125 K (LS).

| Atom | Atom            | Length (Å) |  | Atom | Atom            | Length (Å) |
|------|-----------------|------------|--|------|-----------------|------------|
| Pd1  | C1 <sup>1</sup> | 1.998(3)   |  | Fe1  | N1 <sup>6</sup> | 1.942(3)   |
| Pd1  | C1 <sup>2</sup> | 1.998(3)   |  | N2   | N3              | 1.371(5)   |
| Pd1  | C1 <sup>3</sup> | 1.998(3)   |  | N2   | C4              | 1.323(5)   |
| Pd1  | C1              | 1.998(3)   |  | N3   | C2              | 1.298(5)   |
| Fe1  | N2              | 1.976(3)   |  | N1   | C1              | 1.152(4)   |
| Fe1  | N2 <sup>4</sup> | 1.976(3)   |  | C3   | C3 <sup>7</sup> | 1.400(8)   |
| Fe1  | N1              | 1.942(3)   |  | C3   | C4 <sup>7</sup> | 1.396(6)   |
| Fe1  | N1 <sup>5</sup> | 1.942(3)   |  | C3   | C2              | 1.417(6)   |
| Fe1  | N1 <sup>4</sup> | 1.942(3)   |  |      |                 |            |

<sup>1</sup>1-X,-Y,2-Z; <sup>2</sup>1-X,+Y,2-Z; <sup>3</sup>+X,-Y,+Z; <sup>4</sup>2-X,1-Y,2-Z; <sup>5</sup>+X,1-Y,+Z; <sup>6</sup>2-X,+Y,2-Z; <sup>7</sup>1-X,1-Y,1-Z
**Table S14.** Bond Angles for **1** at 125 K (LS).

| Atom            | Atom | Atom            | Angle (°)  |  | Atom            | Atom | Atom            | Angle (°) |
|-----------------|------|-----------------|------------|--|-----------------|------|-----------------|-----------|
| C1 <sup>1</sup> | Pd1  | C1 <sup>2</sup> | 90.87(16)  |  | N1 <sup>4</sup> | Fe1  | N1 <sup>6</sup> | 89.64(14) |
| C1 <sup>2</sup> | Pd1  | C1              | 89.13(16)  |  | N1 <sup>5</sup> | Fe1  | N1              | 89.64(14) |
| C1 <sup>1</sup> | Pd1  | C1              | 180.0      |  | N1 <sup>4</sup> | Fe1  | N1              | 180.0     |
| C1 <sup>1</sup> | Pd1  | C1 <sup>3</sup> | 89.13(16)  |  | N1 <sup>6</sup> | Fe1  | N1              | 90.36(14) |
| C1 <sup>3</sup> | Pd1  | C1              | 90.87(16)  |  | N1 <sup>4</sup> | Fe1  | N1 <sup>5</sup> | 90.36(14) |
| C1 <sup>2</sup> | Pd1  | C1 <sup>3</sup> | 180.0      |  | N3              | N2   | Fe1             | 117.6(2)  |
| N2 <sup>4</sup> | Fe1  | N2              | 180.00(19) |  | C4              | N2   | Fe1             | 121.9(3)  |
| N1 <sup>5</sup> | Fe1  | N2 <sup>4</sup> | 87.52(10)  |  | C4              | N2   | N3              | 120.5(4)  |
| N1 <sup>5</sup> | Fe1  | N2              | 92.48(10)  |  | C2              | N3   | N2              | 119.2(3)  |
| N1 <sup>6</sup> | Fe1  | N2              | 87.52(10)  |  | C1              | N1   | Fe1             | 167.3(2)  |
| N1              | Fe1  | N2 <sup>4</sup> | 92.48(10)  |  | N1              | C1   | Pd1             | 173.5(2)  |
| N1              | Fe1  | N2              | 87.52(10)  |  | C3 <sup>7</sup> | C3   | C2              | 116.3(5)  |
| N1 <sup>4</sup> | Fe1  | N2              | 92.48(10)  |  | C4 <sup>7</sup> | C3   | C3 <sup>7</sup> | 117.7(4)  |
| N1 <sup>6</sup> | Fe1  | N2 <sup>4</sup> | 92.48(10)  |  | C4 <sup>7</sup> | C3   | C2              | 126.0(4)  |
| N1 <sup>4</sup> | Fe1  | N2 <sup>4</sup> | 87.52(10)  |  | N2              | C4   | C3 <sup>7</sup> | 122.4(4)  |
| N1 <sup>6</sup> | Fe1  | N1 <sup>5</sup> | 180.0      |  | N3              | C2   | C3              | 123.9(4)  |

<sup>1</sup>1-X,-Y,2-Z; <sup>2</sup>+X,-Y,+Z; <sup>3</sup>1-X,+Y,2-Z; <sup>4</sup>2-X,1-Y,2-Z; <sup>5</sup>2-X,+Y,2-Z; <sup>6</sup>+X,1-Y,+Z; <sup>7</sup>1-X,1-Y,1-Z
**Table S15.** Torsion Angles for **1** at 125 K (LS).

| A   | B  | C  | D               | Angle (°)  |  | A               | B  | C  | D  | Angle (°)  |
|-----|----|----|-----------------|------------|--|-----------------|----|----|----|------------|
| Fe1 | N2 | N3 | C2              | 180.000(1) |  | C3 <sup>1</sup> | C3 | C2 | N3 | 0.000(2)   |
| Fe1 | N2 | C4 | C3 <sup>1</sup> | 180.000(1) |  | C4              | N2 | N3 | C2 | 0.000(2)   |
| N2  | N3 | C2 | C3              | 0.000(2)   |  | C4 <sup>1</sup> | C3 | C2 | N3 | 180.000(1) |
| N3  | N2 | C4 | C3 <sup>1</sup> | 0.000(2)   |  |                 |    |    |    |            |

<sup>1</sup>1-X,1-Y,1-Z
**Table S16.** Hydrogen Atom Coordinates (Å×10<sup>4</sup>) and Isotropic Displacement Parameters (Å<sup>2</sup>×10<sup>3</sup>) for **1** at 125 K (LS).

| Atom | <i>x</i> | <i>y</i> | <i>z</i> | U(eq) |
|------|----------|----------|----------|-------|
| H4   | 5536.48  | 5000     | 8133.55  | 16    |
| H2   | 8099.87  | 5000     | 4073.98  | 18    |

**Table S17.** Solvent masks information for **1** at 125 K (LS).

| X     | Y     | Z     | Volume | Electron count Content |
|-------|-------|-------|--------|------------------------|
| 0.026 | 0.000 | 0.500 | 146.5  | 33.7                   |

**Table S18.** Crystal data and structure refinement for **2** at 293 K and 123 K.

|                                                            |                                                                   |                                                                   |
|------------------------------------------------------------|-------------------------------------------------------------------|-------------------------------------------------------------------|
| <b>Empirical formula</b>                                   | C <sub>10</sub> H <sub>4</sub> FeN <sub>8</sub> Pt                | C <sub>10</sub> H <sub>4</sub> FeN <sub>8</sub> Pt                |
| <b>Formula weight</b>                                      | 487.15                                                            | 487.15                                                            |
| <b>Temperature (K)</b>                                     | 293                                                               | 123                                                               |
| <b>Crystal system</b>                                      | monoclinic                                                        | monoclinic                                                        |
| <b>Space group</b>                                         | <i>P2/m</i>                                                       | <i>P2/m</i>                                                       |
| <b><i>a</i> (Å)</b>                                        | 7.1806(5)                                                         | 7.0971(6)                                                         |
| <b><i>b</i> (Å)</b>                                        | 7.4575(5)                                                         | 7.2163(4)                                                         |
| <b><i>c</i> (Å)</b>                                        | 8.4389(8)                                                         | 8.7642(8)                                                         |
| <b><math>\alpha</math> (°)</b>                             | 90                                                                | 90                                                                |
| <b><math>\beta</math> (°)</b>                              | 107.185(9)                                                        | 112.610(10)                                                       |
| <b><math>\gamma</math> (°)</b>                             | 90                                                                | 90                                                                |
| <b>Volume (Å<sup>3</sup>)</b>                              | 431.72(6)                                                         | 414.36(6)                                                         |
| <b>Z</b>                                                   | 1                                                                 | 1                                                                 |
| <b><math>\rho_{\text{calc}}</math> (g cm<sup>-3</sup>)</b> | 1.874                                                             | 1.952                                                             |
| <b><math>\mu</math> (mm<sup>-1</sup>)</b>                  | 8.933                                                             | 9.307                                                             |
| <b>F(000)</b>                                              | 224.0                                                             | 224.0                                                             |
| <b>Crystal size (mm<sup>3</sup>)</b>                       | 0.2 × 0.15 × 0.05                                                 | 0.2 × 0.1 × 0.04                                                  |
| <b>Radiation</b>                                           | MoK $\alpha$ ( $\lambda$ = 0.71073)                               | MoK $\alpha$ ( $\lambda$ = 0.71073)                               |
| <b>2<math>\theta</math> range for data collection (°)</b>  | 5.462 to 58.996                                                   | 5.034 to 65.188                                                   |
| <b>Reflections collected</b>                               | 2512                                                              | 2392                                                              |
| <b>Independent reflections</b>                             | 1299 [ $R_{\text{int}}$ = 0.0711,<br>$R_{\text{sigma}}$ = 0.0925] | 1462 [ $R_{\text{int}}$ = 0.0402,<br>$R_{\text{sigma}}$ = 0.0743] |
| <b>Data/restraints/parameters</b>                          | 1299 / 0 / 57                                                     | 1462 / 0 / 57                                                     |
| <b>Goodness-of-fit on F<sup>2</sup></b>                    | 0.891                                                             | 1.019                                                             |
| <b>Final R indexes [<math>I \geq 2\sigma(I)</math>]</b>    | $R_1$ = 0.0373,<br>$wR_2$ = 0.0585                                | $R_1$ = 0.0359,<br>$wR_2$ = 0.0737                                |
| <b>Final R indexes [all data]</b>                          | $R_1$ = 0.0383,<br>$wR_2$ = 0.0593                                | $R_1$ = 0.0367,<br>$wR_2$ = 0.0744                                |
| <b>Largest diff. peak/hole (e Å<sup>-3</sup>)</b>          | 1.82 / -1.93                                                      | 4.21 / -3.61                                                      |



**Table S19.** Fractional Atomic Coordinates ( $\times 10^4$ ) and Equivalent Isotropic Displacement Parameters ( $\text{\AA}^2 \times 10^3$ ) for **2** at 293 K (HS).  $U_{\text{eq}}$  is defined as 1/3 of the trace of the orthogonalised  $U_{ij}$  tensor.

| Atom | <i>x</i> | <i>y</i> | <i>z</i> | $U(\text{eq})$ |
|------|----------|----------|----------|----------------|
| Pt1  | 0        | 0        | 5000     | 18.44(11)      |
| Fe1  | 5000     | 5000     | 5000     | 15.7(3)        |
| C2   | 7574(10) | 5000     | 10292(8) | 35(2)          |
| N1   | 3233(6)  | 2982(6)  | 5660(5)  | 27.6(10)       |
| C4   | 9023(9)  | 5000     | 7737(8)  | 26.8(17)       |
| N2   | 7132(8)  | 5000     | 7481(7)  | 26.3(14)       |
| C3   | 9613(9)  | 5000     | 10667(8) | 24.8(17)       |
| C1   | 2057(7)  | 1870(7)  | 5447(6)  | 23.7(11)       |
| N3   | 6392(8)  | 5000     | 8788(7)  | 34.8(18)       |

**Table S20.** Anisotropic Displacement Parameters ( $\text{\AA}^2 \times 10^3$ ) for **2** at 293 K (HS). The Anisotropic displacement factor exponent takes the form:  $-2\pi^2[h^2a^{*2}U_{11}+2hka^*b^*U_{12}+\dots]$ .

| Atom | $U_{11}$  | $U_{22}$  | $U_{33}$ | $U_{23}$ | $U_{13}$ | $U_{12}$ |
|------|-----------|-----------|----------|----------|----------|----------|
| Pt1  | 12.07(17) | 13.54(19) | 30.2(2)  | 0        | 6.94(14) | 0        |
| Fe1  | 8.6(6)    | 16.0(7)   | 20.4(6)  | 0        | 1.3(5)   | 0        |
| C2   | 16(3)     | 68(7)     | 20(4)    | 0        | 4(3)     | 0        |
| N1   | 24(2)     | 20(2)     | 40(3)    | 2(2)     | 11(2)    | -8(2)    |
| C4   | 13(3)     | 44(5)     | 25(4)    | 0        | 6(3)     | 0        |
| N2   | 14(3)     | 38(4)     | 25(3)    | 0        | 1(2)     | 0        |
| C3   | 14(3)     | 39(5)     | 22(4)    | 0        | 6(3)     | 0        |
| C1   | 20(2)     | 15(3)     | 36(3)    | -1(2)    | 7(2)     | 1(2)     |
| N3   | 16(3)     | 66(6)     | 22(3)    | 0        | 5(2)     | 0        |

**Table S21.** Bond Lengths for **2** at 293 K (HS).

| Atom | Atom            | Length ( $\text{\AA}$ ) |  | Atom | Atom            | Length ( $\text{\AA}$ ) |
|------|-----------------|-------------------------|--|------|-----------------|-------------------------|
| Pt1  | C1 <sup>1</sup> | 1.985(5)                |  | Fe1  | N2 <sup>6</sup> | 2.199(5)                |
| Pt1  | C1              | 1.985(5)                |  | C2   | C3              | 1.404(9)                |
| Pt1  | C1 <sup>2</sup> | 1.985(5)                |  | C2   | N3              | 1.302(8)                |
| Pt1  | C1 <sup>3</sup> | 1.985(5)                |  | N1   | C1              | 1.159(6)                |
| Fe1  | N1 <sup>4</sup> | 2.145(4)                |  | C4   | N2              | 1.310(8)                |
| Fe1  | N1              | 2.145(4)                |  | C4   | C3 <sup>7</sup> | 1.412(9)                |
| Fe1  | N1 <sup>5</sup> | 2.145(4)                |  | N2   | N3              | 1.358(7)                |
| Fe1  | N1 <sup>6</sup> | 2.145(4)                |  | C3   | C3 <sup>7</sup> | 1.395(11)               |
| Fe1  | N2              | 2.199(5)                |  |      |                 |                         |

<sup>1</sup>-X,-Y,1-Z; <sup>2</sup>+X,-Y,+Z; <sup>3</sup>-X,+Y,1-Z; <sup>4</sup>1-X,+Y,1-Z; <sup>5</sup>+X,1-Y,+Z; <sup>6</sup>1-X,1-Y,1-Z; <sup>7</sup>2-X,1-Y,2-Z

**Table S22.** Bond Angles for **2** at 293 K (HS).

| Atom            | Atom | Atom            | Angle (°) |  | Atom            | Atom | Atom            | Angle (°) |
|-----------------|------|-----------------|-----------|--|-----------------|------|-----------------|-----------|
| C1 <sup>1</sup> | Pt1  | C1              | 180.0     |  | N1 <sup>5</sup> | Fe1  | N2              | 87.06(15) |
| C1              | Pt1  | C1 <sup>2</sup> | 89.2(3)   |  | N1 <sup>5</sup> | Fe1  | N2 <sup>4</sup> | 92.94(15) |
| C1 <sup>1</sup> | Pt1  | C1 <sup>2</sup> | 90.8(3)   |  | N1 <sup>4</sup> | Fe1  | N2              | 87.06(15) |
| C1              | Pt1  | C1 <sup>3</sup> | 90.8(3)   |  | N1 <sup>6</sup> | Fe1  | N2              | 92.94(15) |
| C1 <sup>1</sup> | Pt1  | C1 <sup>3</sup> | 89.2(3)   |  | N2              | Fe1  | N2 <sup>4</sup> | 180.0     |
| C1 <sup>2</sup> | Pt1  | C1 <sup>3</sup> | 180.0     |  | N3              | C2   | C3              | 123.8(6)  |
| N1              | Fe1  | N1 <sup>4</sup> | 180.0     |  | C1              | N1   | Fe1             | 157.1(4)  |
| N1              | Fe1  | N1 <sup>5</sup> | 90.9(2)   |  | N2              | C4   | C3 <sup>7</sup> | 123.3(6)  |
| N1 <sup>4</sup> | Fe1  | N1 <sup>6</sup> | 90.9(2)   |  | C4              | N2   | Fe1             | 123.5(5)  |
| N1 <sup>6</sup> | Fe1  | N1 <sup>5</sup> | 180.0(2)  |  | C4              | N2   | N3              | 120.1(6)  |
| N1 <sup>4</sup> | Fe1  | N1 <sup>5</sup> | 89.1(2)   |  | N3              | N2   | Fe1             | 116.4(4)  |
| N1              | Fe1  | N1 <sup>6</sup> | 89.1(2)   |  | C2              | C3   | C4 <sup>7</sup> | 126.7(6)  |
| N1              | Fe1  | N2              | 92.94(15) |  | C3 <sup>7</sup> | C3   | C2              | 117.1(8)  |
| N1 <sup>6</sup> | Fe1  | N2 <sup>4</sup> | 87.06(15) |  | C3 <sup>7</sup> | C3   | C4 <sup>7</sup> | 116.2(8)  |
| N1 <sup>4</sup> | Fe1  | N2 <sup>4</sup> | 92.94(15) |  | N1              | C1   | Pt1             | 177.9(5)  |
| N1              | Fe1  | N2 <sup>4</sup> | 87.06(15) |  | C2              | N3   | N2              | 119.5(6)  |

<sup>1</sup>-X,-Y,1-Z; <sup>2</sup>+X,-Y,+Z; <sup>3</sup>-X,+Y,1-Z; <sup>4</sup>1-X,1-Y,1-Z; <sup>5</sup>1-X,+Y,1-Z; <sup>6</sup>+X,1-Y,+Z; <sup>7</sup>2-X,1-Y,2-Z
**Table S23.** Torsion Angles for **2** at 293 K (HS).

| A               | B  | C  | D   | Angle (°)  |  | A               | B  | C  | D               | Angle (°)  |
|-----------------|----|----|-----|------------|--|-----------------|----|----|-----------------|------------|
| Fe1             | N2 | N3 | C2  | 180.000(3) |  | C3 <sup>1</sup> | C4 | N2 | N3              | 0.000(3)   |
| C4              | N2 | N3 | C2  | 0.000(4)   |  | N3              | C2 | C3 | C4 <sup>1</sup> | 180.000(4) |
| C3              | C2 | N3 | N2  | 0.000(4)   |  | N3              | C2 | C3 | C3 <sup>1</sup> | 0.000(6)   |
| C3 <sup>1</sup> | C4 | N2 | Fe1 | 180.000(2) |  |                 |    |    |                 |            |

<sup>1</sup>2-X,1-Y,2-Z
**Table S24.** Hydrogen Atom Coordinates (Å×10<sup>4</sup>) and Isotropic Displacement Parameters (Å<sup>2</sup>×10<sup>3</sup>) for **2** at 293 K (HS).

| Atom | <i>x</i> | <i>y</i> | <i>z</i> | U(eq) |
|------|----------|----------|----------|-------|
| H2   | 7036.86  | 5000     | 11168.57 | 42    |
| H4   | 9490.29  | 5000     | 6819.77  | 32    |

**Table S25.** Solvent masks information for **2** at 293 K (HS).

| X     | Y     | Z      | Volume | Electron count Content |
|-------|-------|--------|--------|------------------------|
| 0.471 | 0.000 | -0.013 | 160.1  | 35.3                   |

**Table S26.** Fractional Atomic Coordinates ( $\times 10^4$ ) and Equivalent Isotropic Displacement Parameters ( $\text{\AA}^2 \times 10^3$ ) for **2** at 123 K (LS).  $U_{\text{eq}}$  is defined as 1/3 of the trace of the orthogonalised  $U_{ij}$  tensor.

| Atom | <i>x</i> | <i>y</i> | <i>z</i> | <i>U</i> (eq) |
|------|----------|----------|----------|---------------|
| Pt1  | 10000    | 10000    | 10000    | 8.72(10)      |
| Fe1  | 5000     | 5000     | 10000    | 7.5(2)        |
| N2   | 3023(8)  | 5000     | 7675(7)  | 9.5(10)       |
| C4   | 2548(10) | 5000     | 4895(8)  | 13.8(12)      |
| C2   | 1034(9)  | 5000     | 7285(8)  | 11.6(12)      |
| N3   | 3818(8)  | 5000     | 6455(7)  | 13.7(11)      |
| N1   | 6672(5)  | 6922(5)  | 9578(5)  | 11.8(7)       |
| C1   | 7873(7)  | 8053(6)  | 9648(6)  | 12.1(8)       |
| C3   | -378(10) | 5000     | 5614(8)  | 13.4(12)      |

**Table S27.** Anisotropic Displacement Parameters ( $\text{\AA}^2 \times 10^3$ ) for **2** at 123 K (LS). The Anisotropic displacement factor exponent takes the form:  $-2\pi^2[h^2a^{*2}U_{11}+2hka^*b^*U_{12}+\dots]$ .

| Atom | $U_{11}$ | $U_{22}$ | $U_{33}$  | $U_{23}$ | $U_{13}$ | $U_{12}$ |
|------|----------|----------|-----------|----------|----------|----------|
| Pt1  | 8.40(15) | 7.14(15) | 11.38(16) | 0        | 4.66(12) | 0        |
| Fe1  | 8.5(5)   | 6.2(5)   | 8.2(5)    | 0        | 3.6(4)   | 0        |
| N2   | 9(2)     | 9(2)     | 10(2)     | 0        | 4.0(19)  | 0        |
| C4   | 15(3)    | 18(3)    | 10(3)     | 0        | 6(2)     | 0        |
| C2   | 16(3)    | 8(3)     | 10(3)     | 0        | 5(2)     | 0        |
| N3   | 10(2)    | 18(3)    | 13(3)     | 0        | 4(2)     | 0        |
| N1   | 11.6(17) | 11.4(17) | 12.5(17)  | 3.4(15)  | 4.6(14)  | 0.6(13)  |
| C1   | 14(2)    | 8.3(18)  | 15(2)     | 1.4(17)  | 6.4(17)  | 4.7(15)  |
| C3   | 14(3)    | 15(3)    | 11(3)     | 0        | 4(2)     | 0        |

**Table S28.** Bond Lengths for **2** at 123 K (LS).

| Atom | Atom            | Length ( $\text{\AA}$ ) |  | Atom | Atom            | Length ( $\text{\AA}$ ) |
|------|-----------------|-------------------------|--|------|-----------------|-------------------------|
| Pt1  | C1              | 1.997(5)                |  | Fe1  | N1 <sup>6</sup> | 1.951(4)                |
| Pt1  | C1 <sup>1</sup> | 1.997(4)                |  | N2   | C2              | 1.318(8)                |
| Pt1  | C1 <sup>2</sup> | 1.997(4)                |  | N2   | N3              | 1.387(8)                |
| Pt1  | C1 <sup>3</sup> | 1.997(5)                |  | C4   | N3              | 1.317(8)                |
| Fe1  | N2 <sup>4</sup> | 1.980(5)                |  | C4   | C3 <sup>7</sup> | 1.429(9)                |
| Fe1  | N2              | 1.980(5)                |  | C2   | C3              | 1.421(9)                |
| Fe1  | N1 <sup>5</sup> | 1.951(4)                |  | N1   | C1              | 1.165(6)                |
| Fe1  | N1              | 1.951(4)                |  | C3   | C3 <sup>7</sup> | 1.375(13)               |
| Fe1  | N1 <sup>4</sup> | 1.951(4)                |  |      |                 |                         |

<sup>1</sup>2-X,+Y,2-Z; <sup>2</sup>+X,2-Y,+Z; <sup>3</sup>2-X,2-Y,2-Z; <sup>4</sup>1-X,1-Y,2-Z; <sup>5</sup>1-X,+Y,2-Z; <sup>6</sup>+X,1-Y,+Z; <sup>7</sup>-X,1-Y,1-Z

**Table S29.** Bond Angles for **2** at 123 K (LS).

| Atom            | Atom | Atom            | Angle (°)  |  | Atom            | Atom | Atom            | Angle (°) |
|-----------------|------|-----------------|------------|--|-----------------|------|-----------------|-----------|
| C1              | Pt1  | C1 <sup>1</sup> | 180.00(19) |  | N1 <sup>6</sup> | Fe1  | N1 <sup>5</sup> | 180.0     |
| C1 <sup>2</sup> | Pt1  | C1 <sup>3</sup> | 180.0      |  | N1              | Fe1  | N1 <sup>5</sup> | 89.4(2)   |
| C1              | Pt1  | C1 <sup>2</sup> | 89.4(2)    |  | N1              | Fe1  | N1 <sup>6</sup> | 90.6(2)   |
| C1 <sup>1</sup> | Pt1  | C1 <sup>3</sup> | 89.4(2)    |  | N1              | Fe1  | N1 <sup>4</sup> | 180.0     |
| C1 <sup>1</sup> | Pt1  | C1 <sup>2</sup> | 90.6(2)    |  | N1 <sup>4</sup> | Fe1  | N1 <sup>5</sup> | 90.6(2)   |
| C1              | Pt1  | C1 <sup>3</sup> | 90.6(2)    |  | C2              | N2   | Fe1             | 122.1(5)  |
| N2 <sup>4</sup> | Fe1  | N2              | 180.0      |  | C2              | N2   | N3              | 120.8(5)  |
| N1 <sup>5</sup> | Fe1  | N2              | 87.31(15)  |  | N3              | N2   | Fe1             | 117.1(4)  |
| N1 <sup>6</sup> | Fe1  | N2 <sup>4</sup> | 87.31(15)  |  | N3              | C4   | C3 <sup>7</sup> | 123.4(6)  |
| N1 <sup>4</sup> | Fe1  | N2 <sup>4</sup> | 92.69(15)  |  | N2              | C2   | C3              | 121.9(6)  |
| N1              | Fe1  | N2              | 92.69(15)  |  | C4              | N3   | N2              | 118.7(5)  |
| N1 <sup>5</sup> | Fe1  | N2 <sup>4</sup> | 92.69(15)  |  | C1              | N1   | Fe1             | 167.0(4)  |
| N1              | Fe1  | N2 <sup>4</sup> | 87.31(16)  |  | N1              | C1   | Pt1             | 174.6(4)  |
| N1 <sup>4</sup> | Fe1  | N2              | 87.31(16)  |  | C2              | C3   | C4 <sup>7</sup> | 124.8(6)  |
| N1 <sup>6</sup> | Fe1  | N2              | 92.69(15)  |  | C3 <sup>7</sup> | C3   | C4 <sup>7</sup> | 117.0(7)  |
| N1 <sup>4</sup> | Fe1  | N1 <sup>6</sup> | 89.4(2)    |  | C3 <sup>7</sup> | C3   | C2              | 118.2(7)  |

<sup>1</sup>2-X,2-Y,2-Z; <sup>2</sup>+X,2-Y,+Z; <sup>3</sup>2-X,+Y,2-Z; <sup>4</sup>1-X,1-Y,2-Z; <sup>5</sup>1-X,+Y,2-Z; <sup>6</sup>+X,1-Y,+Z; <sup>7</sup>-X,1-Y,1-Z
**Table S30.** Torsion Angles for **2** at 123 K (LS).

| A   | B  | C  | D               | Angle (°)  |  | A               | B  | C  | D  | Angle (°) |
|-----|----|----|-----------------|------------|--|-----------------|----|----|----|-----------|
| Fe1 | N2 | C2 | C3              | 180.000(2) |  | C2              | N2 | N3 | C4 | 0.000(3)  |
| Fe1 | N2 | N3 | C4              | 180.000(2) |  | N3              | N2 | C2 | C3 | 0.000(3)  |
| N2  | C2 | C3 | C4 <sup>1</sup> | 180.000(3) |  | C3 <sup>1</sup> | C4 | N3 | N2 | 0.000(3)  |
| N2  | C2 | C3 | C3 <sup>1</sup> | 0.000(4)   |  |                 |    |    |    |           |

<sup>1</sup>-X,1-Y,1-Z
**Table S31.** Hydrogen Atom Coordinates (Å×10<sup>4</sup>) and Isotropic Displacement Parameters (Å<sup>2</sup>×10<sup>3</sup>) for **2** at 123 K (LS).

| Atom | <i>x</i> | <i>y</i> | <i>z</i> | U(eq) |
|------|----------|----------|----------|-------|
| H4   | 3102.14  | 5000     | 4066.49  | 17    |
| H2   | 530.95   | 5000     | 8144.57  | 14    |

**Table S32.** Solvent masks information for **2** at 123 K (LS).

| X      | Y     | Z     | Volume | Electron count Content |
|--------|-------|-------|--------|------------------------|
| -0.205 | 0.000 | 0.500 | 149.3  | 13.4                   |
